# Supplementary material for: Mechanism of Action of Magnesium Lithospermate B against Aging and Obesity-Induced ER Stress, Insulin Resistance, and Inflammsome Formation in the Liver
Source: MDPI journal article supplement (doi:10.3390/molecules23092098), 2018-08-21
Supplement: s1 [file s1]

Supplementary Figure S1.

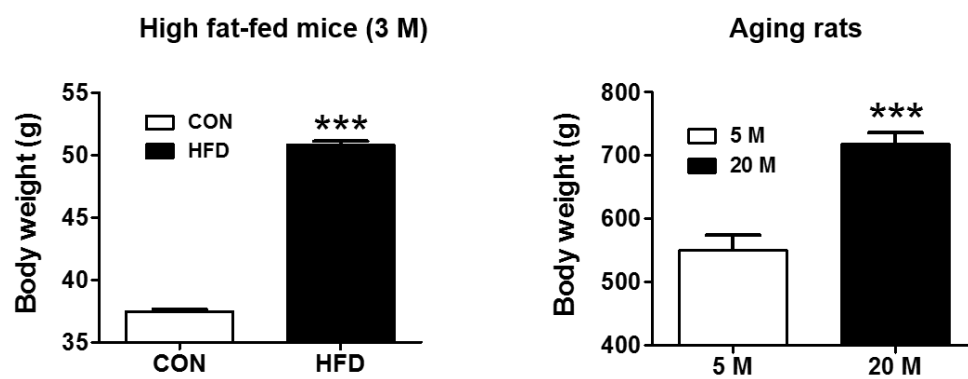

Supplmentary Figure S1. The body weight was measured at the end of the experiments to check whether HFD feeding or biological aging increase body weight as expected.
